# Supplementary material for: Effects of Combined Pentadecanoic Acid and Tamoxifen Treatment on Tamoxifen Resistance in MCF−7/SC Breast Cancer Cells
Source: MDPI journal article supplement (doi:10.3390/ijms231911340), 2022-09-26
Supplement: s1 [file s1]

# Effects of Combined Pentadecanoic acid and Tamoxifen Treatment on Tamoxifen Resistance in MCF-7/SC Breast Cancer Cells

## Supplementary Material

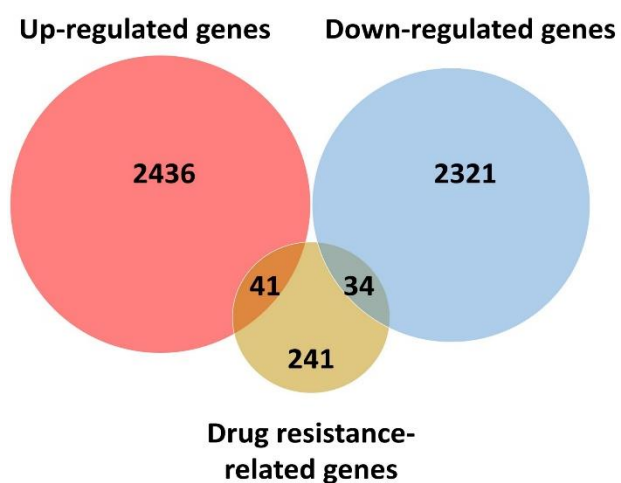

**Figure S1. Venn diagram showing the number of overlapping genes between the upregulated and downregulated genes for drug-resistant markers.**

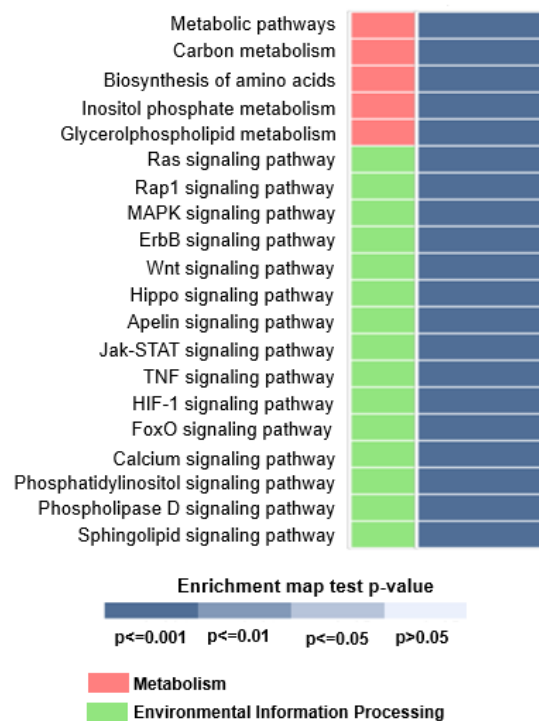

**Figure S2.** The top 20 pathways enriched in MCF-7/SC cells compared with those in MCF-7 cells.

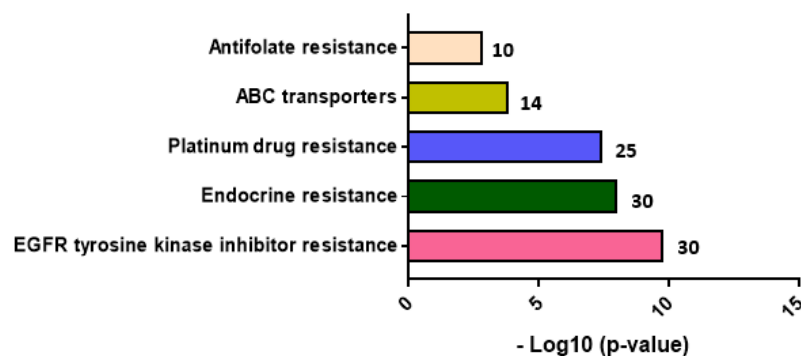

**Figure S3.** KEGG pathway analysis indicating the number of DEGs belonging to each of the enrichment-resistant pathways in MCF-7/SC compared with those in MCF-7 cells.

Endocrine resistance (hsa 01522)

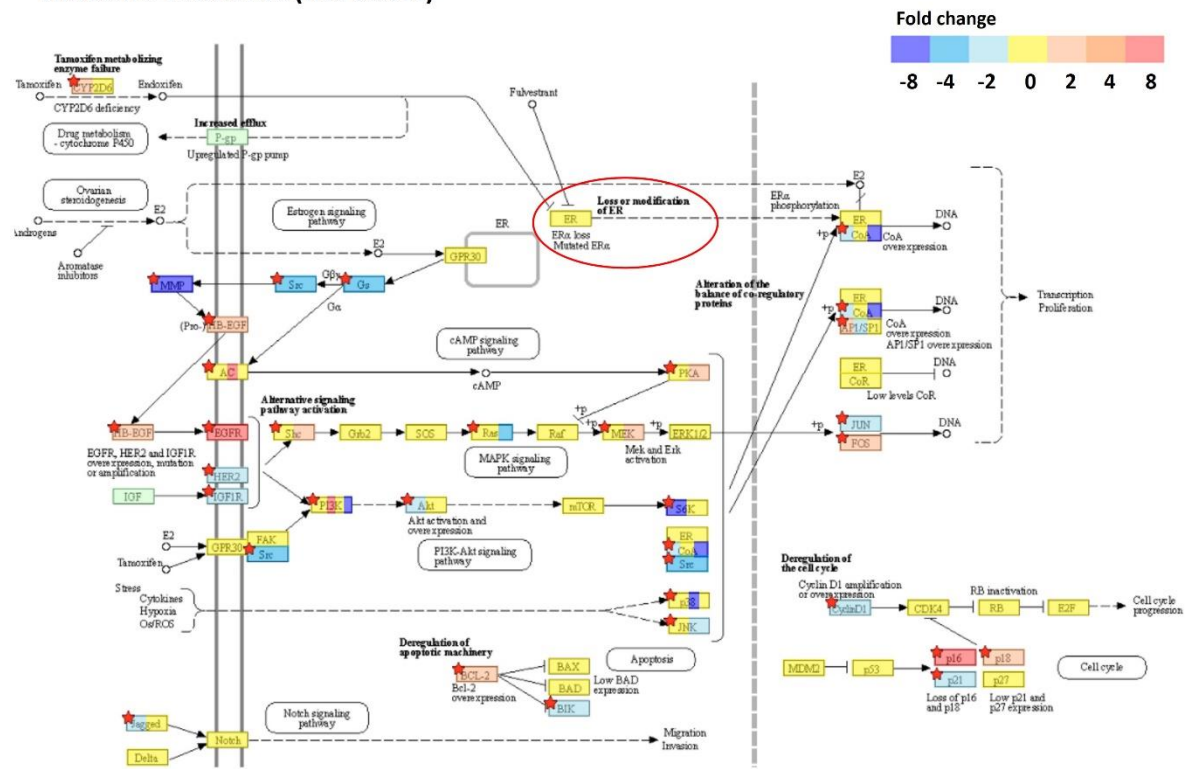

Figure S4. KEGG pathway map: Endocrine signaling pathway

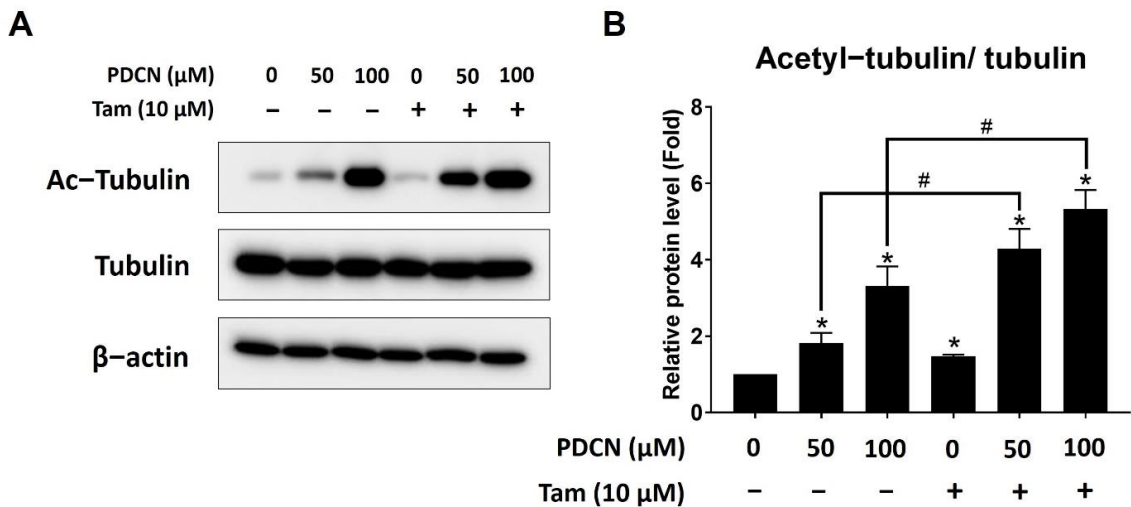

Figure S5. Pentadecanoic acid combined with tamoxifen enhanced the acetylation of intracellular  $\alpha$ -tubulin.

**A**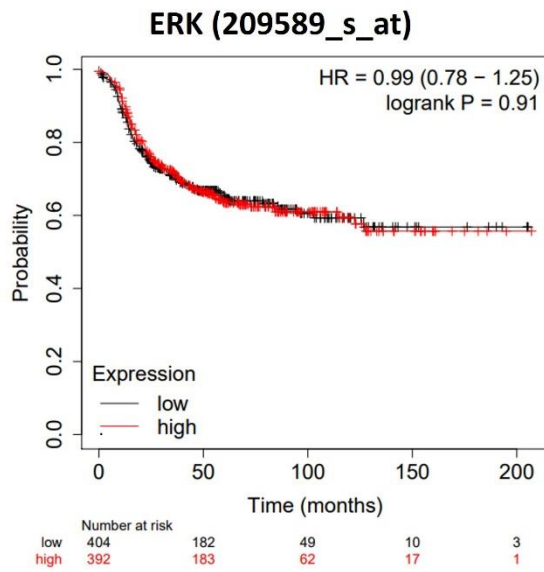**B**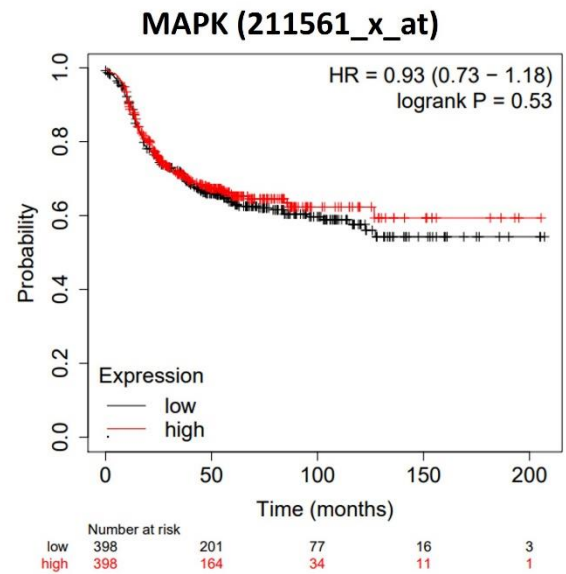**C**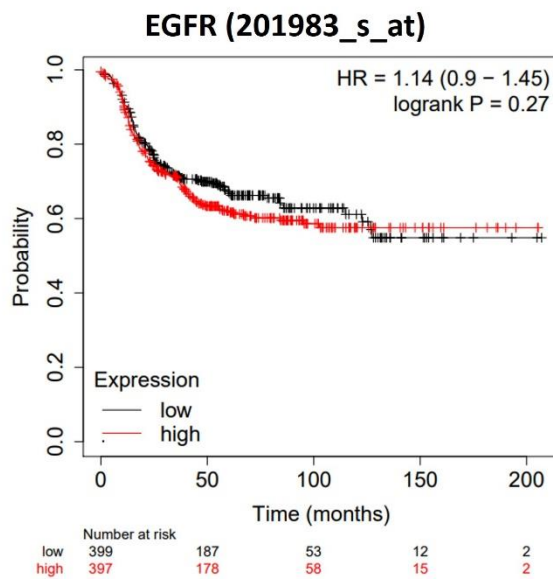**D**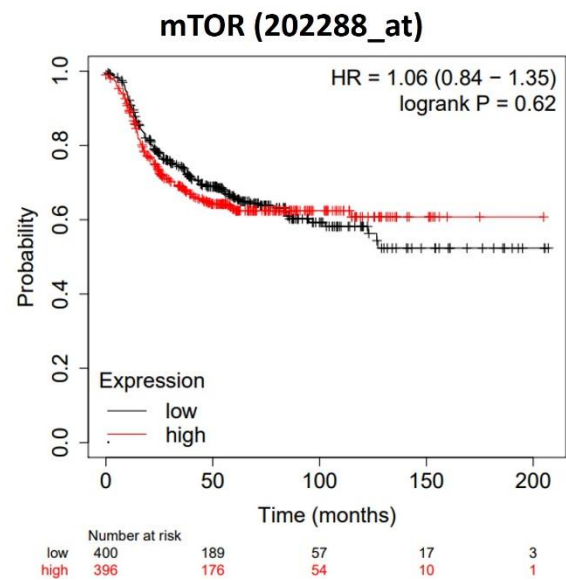

**Figure S6. Analysis of ERK, MAPK, EGFR, mTOR expression in ER-negative breast cancer patients.**

**Table S1. The antibody list for Western blot**

| <b><i>Antibody</i></b>               | <b><i>Dilution ratio</i></b> | <b><i>Catalog number and Company</i></b> |
|--------------------------------------|------------------------------|------------------------------------------|
| <b><i>B-actin</i></b>                | 1:10000                      | #3700 (Cell Signaling Technology)        |
| <b><i>E-cadherin</i></b>             | 1:1000                       | 610181 (BD Biosciences)                  |
| <b><i>ZEB1</i></b>                   | 1:500                        | #3396 (Cell Signaling Technology)        |
| <b><i>Bcl2</i></b>                   | 1:1000                       | #4223 (Cell Signaling Technology)        |
| <b><i>Rb</i></b>                     | 1:1000                       | #9309 (Cell Signaling Technology)        |
| <b><i>p-Rb</i></b>                   | 1:1000                       | #9308 (Cell Signaling Technology)        |
| <b><i>p21</i></b>                    | 1:1000                       | #2947 (Cell Signaling Technology)        |
| <b><i>cdc2</i></b>                   | 1:1000                       | #9116 (Cell Signaling Technology)        |
| <b><i>ER-<math>\alpha</math></i></b> | 1:500                        | #8644 (Cell Signaling Technology)        |
| <b><i>Caspase 9</i></b>              | 1:1000                       | #9502 (Cell Signaling Technology)        |
| <b><i>Cleaved- Caspase 9</i></b>     | 1:1000                       | #9505 (Cell Signaling Technology)        |
| <b><i>Caspase 7</i></b>              | 1:1000                       | #9492 (Cell Signaling Technology)        |
| <b><i>Cleaved- Caspase 7</i></b>     | 1:1000                       | #9491 (Cell Signaling Technology)        |
| <b><i>Caspase 3</i></b>              | 1:1000                       | #9662 (Cell Signaling Technology)        |
| <b><i>Cleaved- Caspase 3</i></b>     | 1:500                        | #9661 (Cell Signaling Technology)        |
| <b><i>PARP</i></b>                   | 1:1000                       | #9542 (Cell Signaling Technology)        |
| <b><i>Snail</i></b>                  | 1:1000                       | #3879 (Cell Signaling Technology)        |
| <b><i>Slug</i></b>                   | 1:500                        | #9585 (Cell Signaling Technology)        |
| <b><i>MMP9</i></b>                   | 1:1000                       | #3852 (Cell Signaling Technology)        |
| <b><i>Vimentin</i></b>               | 1:1000                       | #5741 (Cell Signaling Technology)        |
| <b><i>STAT3</i></b>                  | 1:1000                       | #9139 (Cell Signaling Technology)        |
| <b><i>p-STAT3</i></b>                | 1:500                        | #9145 (Cell Signaling Technology)        |
| <b><i>Erk1/2</i></b>                 | 1:1000                       | #9102 (Cell Signaling Technology)        |
| <b><i>p- Erk1/2</i></b>              | 1:1000                       | #9101 (Cell Signaling Technology)        |
| <b><i>p38</i></b>                    | 1:500                        | #9212 (Cell Signaling Technology)        |
| <b><i>p-p38</i></b>                  | 1:500                        | #9211 (Cell Signaling Technology)        |
| <b><i>EGFR</i></b>                   | 1:1000                       | #2232 (Cell Signaling Technology)        |
| <b><i>p-EGFR</i></b>                 | 1:500                        | #2234 (Cell Signaling Technology)        |
| <b><i>mTOR</i></b>                   | 1:1000                       | #2983 (Cell Signaling Technology)        |

|                   |        |                                   |
|-------------------|--------|-----------------------------------|
| <i>p-mTOR</i>     | 1:500  | #2971 (Cell Signaling Technology) |
| <i>Tubulin</i>    | 1:1000 | #2144 (Cell Signaling Technology) |
| <i>Ac-Tubulin</i> | 1:1000 | #5335 (Cell Signaling Technology) |

**Table S2. The primer sequences for qRT-PCR**

| <i>Genes</i>        | <i>Primer sequences</i> |                           |
|---------------------|-------------------------|---------------------------|
| <b><i>ESR1</i></b>  | Forward (5'→3')         | AGCTCCTCCTCATCCTCTCC      |
|                     | Reverse (5'→3')         | TCTCCAGCAGCAGGTCATAG      |
| <b><i>CA12</i></b>  | Forward (5'→3')         | TGGCATTCTTGGCATCTGTA      |
|                     | Reverse (5'→3')         | TTGGTGGCTGGCTTGTAAT       |
| <b><i>NR1P1</i></b> | Forward (5'→3')         | TCGCACTCACCACAGAAAAC      |
|                     | Reverse (5'→3')         | AGCCAAGCTCTTCTCCATGT      |
| <b><i>RARA</i></b>  | Forward (5'→3')         | CGCTGCTGGAGGCGCTAAAG      |
|                     | Reverse (5'→3')         | GCGCTGATGCTTCGCAGGTC      |
| <b><i>XBPI</i></b>  | Forward (5'→3')         | GCGCCTCACGCACCTG          |
|                     | Reverse (5'→3')         | GCTGCTACTCTGTTTTTCAGTTTCC |
| <b><i>TFF1</i></b>  | Forward (5'→3')         | GTGTCACGCCCTCCCAGT        |
|                     | Reverse (5'→3')         | GGACCCACGAACGGTG          |
| <b><i>GREB1</i></b> | Forward (5'→3')         | CAAAGAATAACCTGTTGGCCCTGC  |
|                     | Reverse (5'→3')         | GACATGCCTGCGCTCTCATACTTA  |
| <b><i>FOS</i></b>   | Forward (5'→3')         | CGTCTTCCTTCGTCTTCACC      |
|                     | Reverse (5'→3')         | GTCAGAGGAAGGCTCATTGC      |
| <b><i>BCL2</i></b>  | Forward (5'→3')         | TCCCTCGCTGCACAAATACTC     |
|                     | Reverse (5'→3')         | ACGACCCGATGGCCATAGA       |
